# Supplementary material for: Ensemble intelligence prediction algorithms and land use scenarios to measure carbon emissions of the Yangtze River Delta: A machine learning model based on Long Short-Term Memory
Source: PubMed Central journal article supplement (PMC11627399; doi:10.1371/journal.pone.0311441), 2024-12-09
Supplement: pone.0311441.s001.pdf [file pone.0311441.s001.pdf]

## S1 Appendix. Descriptions of input and output variables.

### Descriptions of input and output variables

| Attribute of variables           |         | Variables                                                          | Unit             | Sym bol | Meaning                                                                                                                                                                           | Source                            |
|----------------------------------|---------|--------------------------------------------------------------------|------------------|---------|-----------------------------------------------------------------------------------------------------------------------------------------------------------------------------------|-----------------------------------|
| S1<br>(Energy consumption stage) | In put  | Built-up area                                                      | square kilometer | X1      | Areas actually developed and built up within the city's administrative districts                                                                                                  | China Statistical Yearbook        |
|                                  |         | Number of employees in industrial enterprises                      | all the people   | X2      | Number of persons formally engaged in work, employed in industrial enterprises and projects                                                                                       | China City Statistical Yearbook   |
|                                  |         | Number of real estate employees                                    | all the people   | X3      | Refers to the total number of people working in the real estate industry                                                                                                          | China City Statistical Yearbook   |
|                                  |         | Total energy consumption                                           | tons             | X4      | The sum of all energy sources consumed by the material and non-material production sectors in the country over a given period of time                                             | China Energy Statistical Yearbook |
|                                  |         | Real estate development investment completed                       | \$10,000,000     | X5      | Refers to the amount of investment fully spent on housing construction works, land development works, and investment in public welfare buildings and land acquisition costs, etc. | China City Statistical Yearbook   |
|                                  | O utput | Industrial output value                                            | \$10,000,000     | X6      | Final results of industrial production activities of industrial enterprises expressed in monetary terms during the reporting period                                               | China City Statistical Yearbook   |
|                                  |         | Real estate development enterprises commodity housing sales income | \$10,000,000     | X7      | Revenue from the sale of commercial properties by property development enterprises during the reporting period                                                                    | China City Statistical Yearbook   |
|                                  |         | Industrial land area                                               | square kilometer | X8      | Area occupied by industrial                                                                                                                                                       | China City Statistical Yearbook   |

|                                    |        |                                                                   |                  |     |                                                                                                                                                             |                                          |
|------------------------------------|--------|-------------------------------------------------------------------|------------------|-----|-------------------------------------------------------------------------------------------------------------------------------------------------------------|------------------------------------------|
|                                    |        |                                                                   |                  |     | enterprises                                                                                                                                                 |                                          |
|                                    |        | Residential land area                                             | square kilometer | X9  | Total area of residential land, public building land, road and square land and public green space, etc.                                                     | China City Statistical Yearbook          |
|                                    |        | Carbon emissions from industrial land ( <b>not expected</b> )     | tons             | X10 | Industrial carbon emissions not only have an impact on the environment, but also have a negative impact on the industrial and energy structures             | China City Statistical Yearbook          |
|                                    |        | Carbon emissions from residential land use ( <b>not desired</b> ) | tons             | X11 | As a high energy consuming and greenhouse gas emitting sector, the real estate industry is one of the larger carbon emitters in the process of urbanization | China City Statistical Yearbook          |
|                                    | Link   | Comprehensive discharge index of three industrial wastes          | tons             | X12 | Combined emissions of waste gas, wastewater and waste residues from industrial production processes                                                         | China Environmental Statistical Yearbook |
|                                    |        | Comprehensive discharge index of domestic waste                   | tons             | X13 | Integrated discharge of all kinds of solid wastes abandoned by urban life, municipal construction and commercial activities, etc.                           | China Environmental Statistical Yearbook |
| S2<br>(Sustainable land use stage) | Input  | Urban environmental protection inputs                             | \$10,000,000     | X15 | Government inputs and support for urban environmental protection projects during the sustainable land use phase                                             | China City Statistical Yearbook          |
|                                    | Output | Harmless treatment of municipal domestic waste                    | %                | X16 | The indicator reflects the level of treatment of domestic waste in urban areas                                                                              | China City Statistical Yearbook          |
|                                    |        | Urban sewage treatment rate                                       | %                | X17 | Indicators for measuring the capacity and efficiency of municipal wastewater treatment                                                                      | China City Statistical Yearbook          |
|                                    |        | Comprehensive utilisation rate of general industrial solid waste  | %                | X18 | Comprehensive use of industrial solid waste as a percentage of industrial solid waste generation                                                            | China City Statistical Yearbook          |
|                                    |        | Urban green space carbon sink                                     | ton              | X19 | Processes by which urban green space plants                                                                                                                 | China City Statistical Yearbook          |

|            |              |              |     |                                                                                                                                                                  |                                                                                                                         |  |
|------------|--------------|--------------|-----|------------------------------------------------------------------------------------------------------------------------------------------------------------------|-------------------------------------------------------------------------------------------------------------------------|--|
|            |              |              |     |                                                                                                                                                                  | absorb atmospheric carbon dioxide and fix it in vegetation and soil, reducing atmospheric carbon dioxide concentrations |  |
| Carry-over | Fixed assets | \$10,000,000 | X14 | Aggregate term for the amount of work involved in the construction and acquisition of fixed assets and the costs associated with it, expressed in monetary terms | China Statistical Yearbook                                                                                              |  |
